# Supplementary material for: Enhanced Photocatalytic Properties and Photoinduced Crystallization of TiO2–Fe2O3 Inverse Opals Fabricated by Atomic Layer Deposition
Source: PubMed Central journal article supplement (PMC11403546; doi:10.1021/acsami.4c10831), 2024-09-03
Supplement: am4c10831_si_001.pdf [file am4c10831_si_001.pdf]

# Supporting Information

## Enhanced photocatalytic properties and photo-induced crystallization of TiO<sub>2</sub>-Fe<sub>2</sub>O<sub>3</sub> inverse opals fabricated by atomic layer deposition

*Carina Hedrich,<sup>1,‡</sup> Nithin T. James,<sup>2,‡</sup> Laura G. Maragno,<sup>2</sup> Valéria de Lima,<sup>3</sup> Sergio Yesid Gómez González,<sup>3</sup> Robert H. Blick,<sup>1</sup> Robert Zierold,<sup>1,\*</sup> and Kaline P. Furlan.<sup>2,\*</sup>*

<sup>1</sup> Center for Hybrid Nanostructures, Universität Hamburg, 22761 Hamburg, Germany.

<sup>2</sup> Hamburg University of Technology (TUHH), Institute of Advanced Ceramics, Integrated Materials Systems Group, Denickestraße 15, 21073 Hamburg, Germany.

<sup>3</sup> Federal University of Santa Catarina (UFSC), Department of Chemical and Food Engineering (EQA), 88040-970 Florianópolis, SC, Brazil

\* Corresponding Authors: [kaline.furlan@tuhh.de](mailto:kaline.furlan@tuhh.de), [rzierold@physnet.uni-hamburg.de](mailto:rzierold@physnet.uni-hamburg.de)

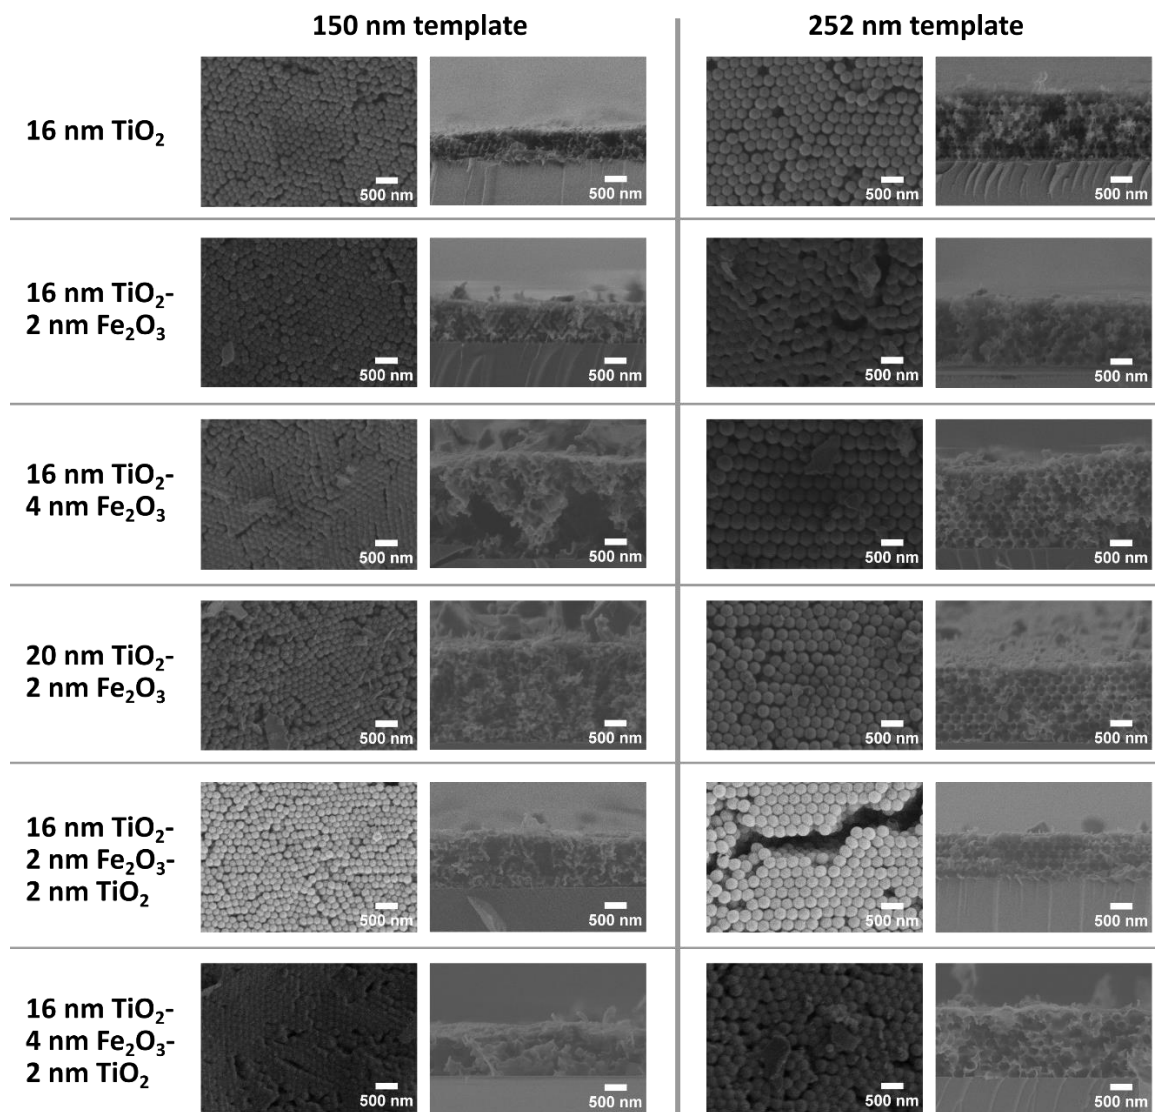

**Figure S1.** SEM micrographs of TiO<sub>2</sub>-Fe<sub>2</sub>O<sub>3</sub> IOs and TiO<sub>2</sub>-Fe<sub>2</sub>O<sub>3</sub> multilayer IOs fabricated with different layer thicknesses and template sizes.

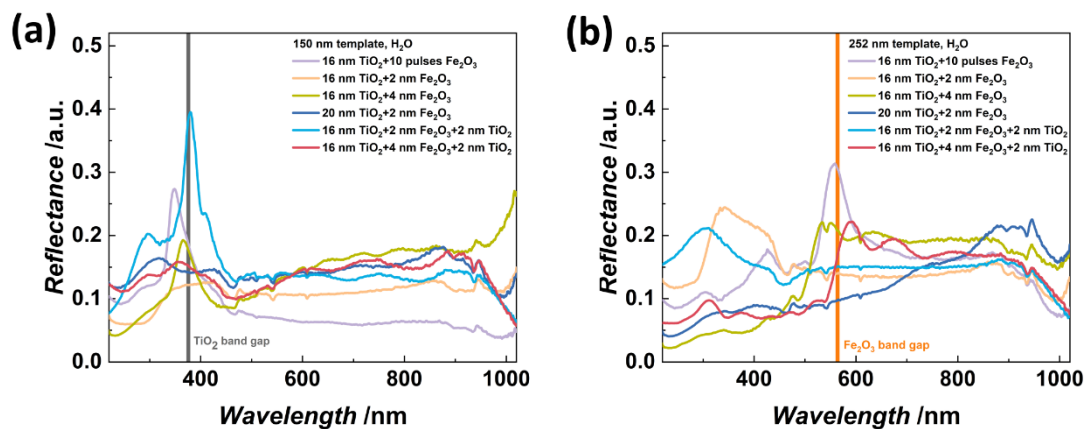

**Figure S2.** Optical properties of all prepared IOs measured in aqueous environment. The samples were prepared with PS particle template sizes of (a) 150 nm and (b) 252 nm.

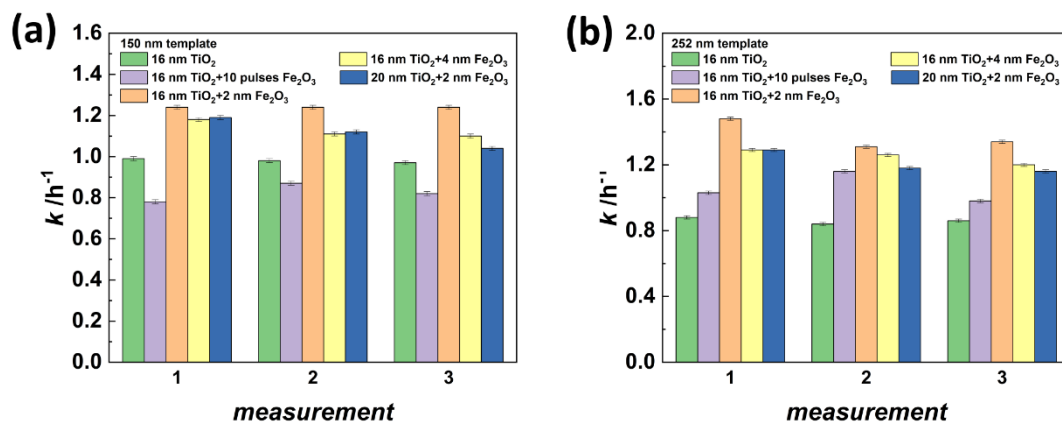

**Figure S3.** Individual photocatalytic activities of three consecutive measurements for TiO<sub>2</sub> IOs and TiO<sub>2</sub>-Fe<sub>2</sub>O<sub>3</sub> bilayer IOs. Different TiO<sub>2</sub> and Fe<sub>2</sub>O<sub>3</sub> thicknesses were tested for template sizes of (a) 150 nm and (b) 252 nm. The

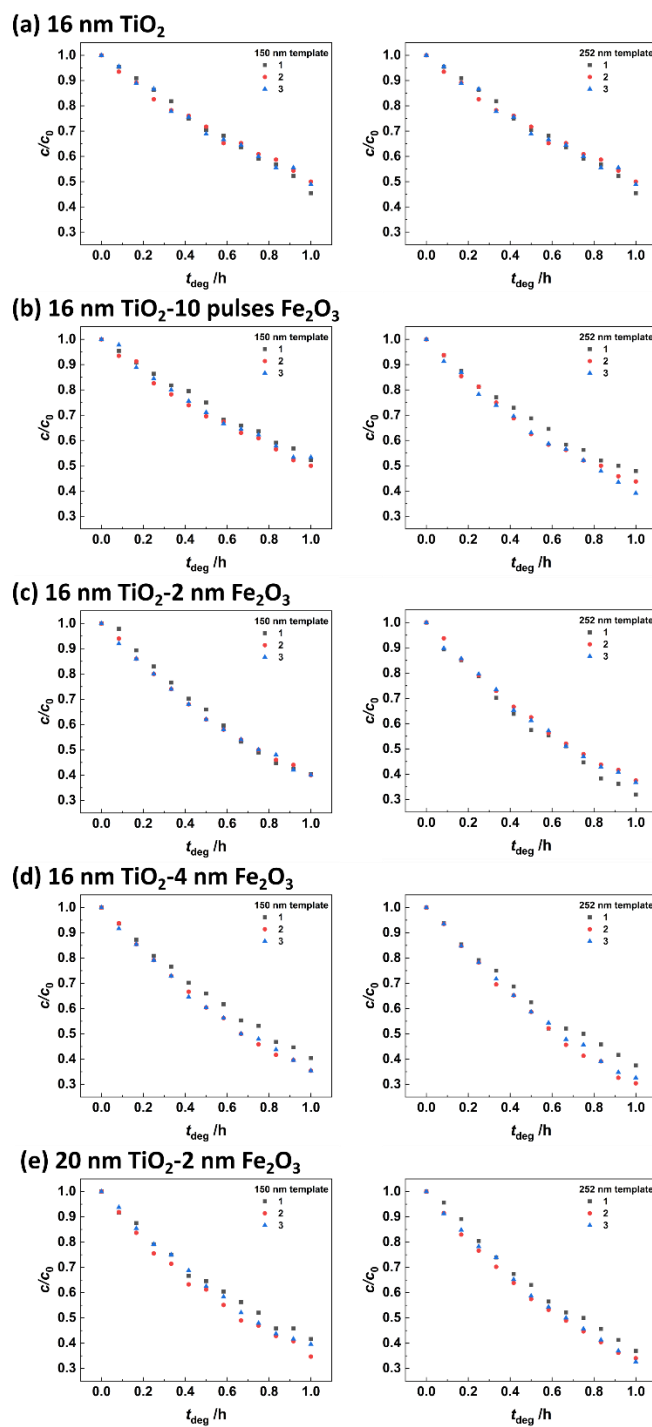

**Figure S4.** Dye concentration decrease during three consecutive photocatalysis measurements for  $\text{TiO}_2$  IOs and  $\text{TiO}_2\text{-Fe}_2\text{O}_3$  bilayer IOs. The data represents the MB degradation by (a) 16 nm  $\text{TiO}_2$  IOs, (b) 16 nm  $\text{TiO}_2\text{-10 pulses Fe}_2\text{O}_3$ , (c) 16 nm  $\text{TiO}_2\text{-2 nm Fe}_2\text{O}_3$ , (d) 16 nm  $\text{TiO}_2\text{-4 nm Fe}_2\text{O}_3$ , and (e) 20 nm  $\text{TiO}_2\text{-2 nm Fe}_2\text{O}_3$ .

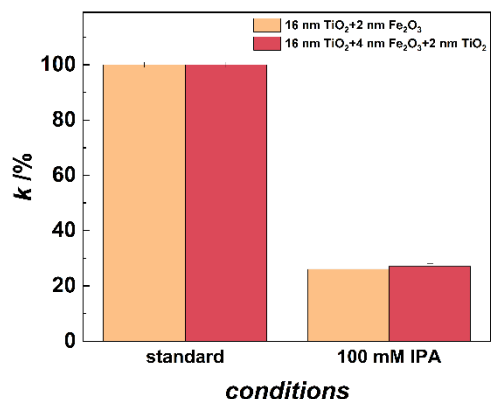

**Figure S5.** Assessment of the photocatalytic activities with MB solution containing 100 mM IPA as hole scavenger. Both, the 16 nm TiO<sub>2</sub>–2 nm Fe<sub>2</sub>O<sub>3</sub> bilayer IO and the 16 nm TiO<sub>2</sub>–4 nm Fe<sub>2</sub>O<sub>3</sub>–2 nm TiO<sub>2</sub> trilayer IO demonstrate significant reduction of their photocatalytic activity compared to standard conditions. Each sample was measured three times with IPA containing solution.

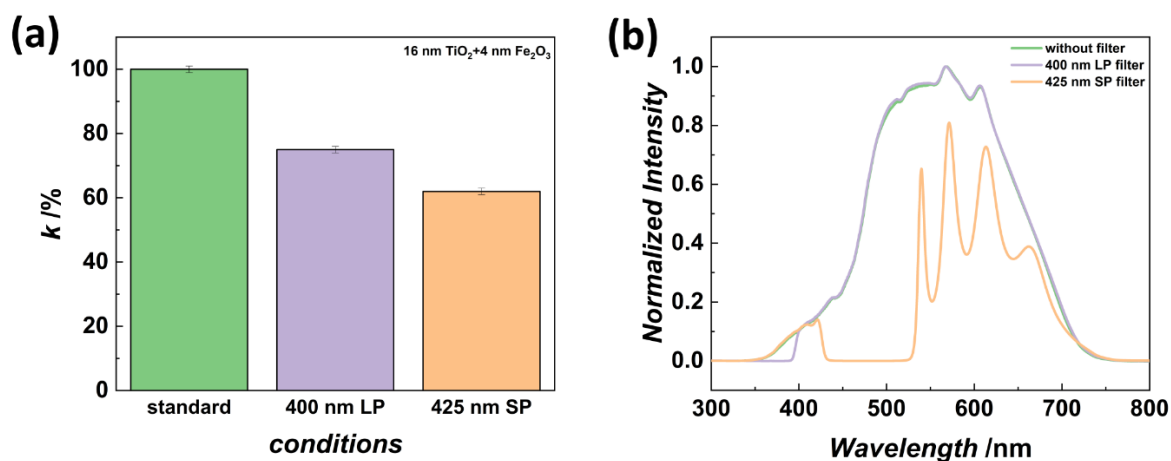

**Figure S6.** Photocatalytic activities under standard illumination conditions without a filter, with a 400 nm longpass (LP) filter, and with a 425 nm shortpass (SP) filter, respectively. (a) Activities of the 16 nm TiO<sub>2</sub>–4 nm Fe<sub>2</sub>O<sub>3</sub> bilayer IO normalized to the illumination without filter. The sample was measured once with each illumination spectra. (b) Optical illumination spectra of the light source with and without filters.

**Table S1.** Comparison of the reaction conditions and photocatalytic performances of Fe<sub>2</sub>O<sub>3</sub>-functionalized TiO<sub>2</sub> nanostructures.

| Sample                                                                        | Fabrication method                                                                                                               | Organic pollutant                                   | Illumination                                     | Photocatalytic activity k                          | reference  |
|-------------------------------------------------------------------------------|----------------------------------------------------------------------------------------------------------------------------------|-----------------------------------------------------|--------------------------------------------------|----------------------------------------------------|------------|
| Fe <sub>2</sub> O <sub>3</sub> -coated TiO <sub>2</sub> powder                | Coating by ALD                                                                                                                   | Methyl orange<br>4 mg/L                             | 300 W Xe lamp<br>with 420 nm<br>shortpass filter | 97.4 % removal<br>after 1.5 h                      | 22         |
| Fe <sub>2</sub> O <sub>3</sub> -coated TiO <sub>2</sub> nanocrystals          | Hydrothermal method                                                                                                              | Rhodamine B<br>50 μM, H <sub>2</sub> O <sub>2</sub> | 8 W daylight white<br>LED                        | 52 % removal<br>after 1 h                          | 23         |
| Fe <sub>2</sub> O <sub>3</sub> -coated TiO <sub>2</sub> nanoporous structures | ALD                                                                                                                              | PEC<br>characterization                             | 150 W Xe lamp                                    |                                                    | 26         |
| Fe <sub>2</sub> O <sub>3</sub> -coated TiO <sub>2</sub> microrod powder       | Hydrothermal method                                                                                                              | Orange II 20 mg/L                                   | 500 W Xe lamp<br>with 420 nm<br>shortpass filter | 54 % removal<br>after 3 h                          | 28         |
| Fe <sub>2</sub> O <sub>3</sub> -coated TiO <sub>2</sub> IO                    | TiO <sub>2</sub> IO by ALD,<br>Fe <sub>2</sub> O <sub>3</sub> coating<br>hydrothermal<br>method                                  | PEC<br>characterization                             | 300 W Xe lamp                                    |                                                    | 33         |
| Fe <sub>2</sub> O <sub>3</sub> -decorated TiO <sub>2</sub> IO                 | TiO <sub>2</sub> IO by sol-gel<br>method, Fe <sub>2</sub> O <sub>3</sub><br>decoration by<br>chemisorption<br>calcination cycles | salicylic acid                                      | 150 W Xe lamp                                    | ~0.9 h <sup>-1</sup> , 75 %<br>removal after 1.5 h | 34         |
| TiO <sub>2</sub> -Fe <sub>2</sub> O <sub>3</sub> multilayer IOs               | ALD                                                                                                                              | Methylene blue<br>2.5 mg/L                          | 150 W halogen<br>lamp                            | 1.38 h <sup>-1</sup> ; 65 %<br>removal after 1 h   | This study |

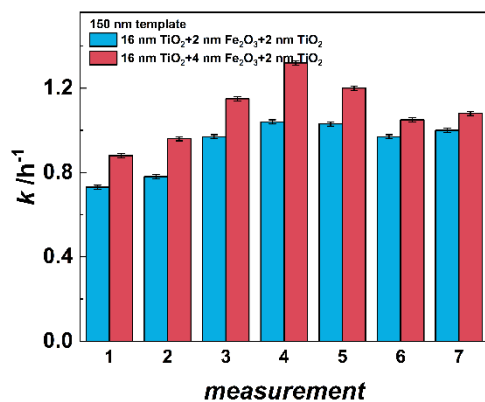

**Figure S7.** The individual activities during seven consecutive measurements of 150 nm template size 16 nm TiO<sub>2</sub>–2 nm Fe<sub>2</sub>O<sub>3</sub>–2 nm TiO<sub>2</sub> and 16 nm TiO<sub>2</sub>–4 nm Fe<sub>2</sub>O<sub>3</sub>–2 nm TiO<sub>2</sub> multilayer IOs show the same behavior as the 252 nm template size, namely increase during the first four measurements, slight decline in the following two measurements, and stable performance afterwards.

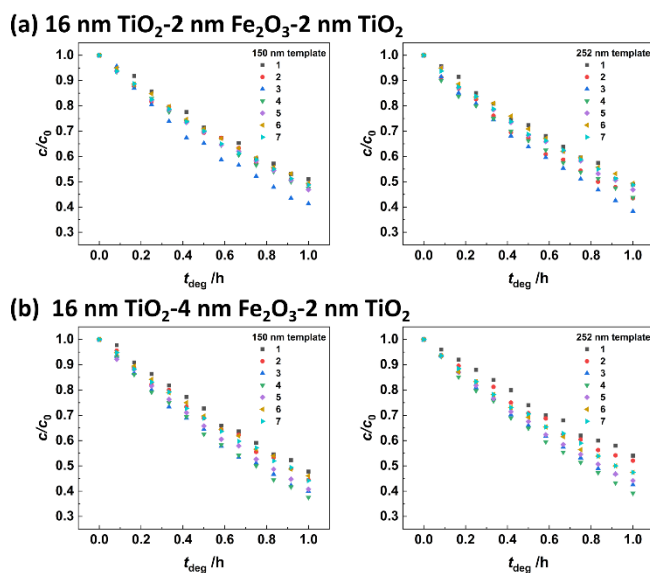

**Figure S8.** MB concentration decrease during seven consecutive measurements of (a) 16 nm TiO<sub>2</sub>–2 nm Fe<sub>2</sub>O<sub>3</sub>–2 nm TiO<sub>2</sub> and (b) 16 nm TiO<sub>2</sub>–4 nm Fe<sub>2</sub>O<sub>3</sub>–2 nm TiO<sub>2</sub> multilayer IOs.

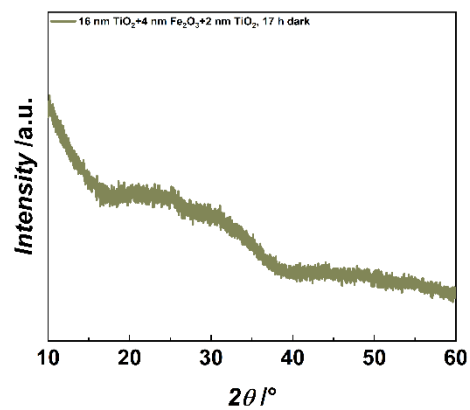

**Figure S9.** XRD pattern of a  $\text{TiO}_2$ - $\text{Fe}_2\text{O}_3$  multilayer IO composed of 16 nm  $\text{TiO}_2$ , 4 nm  $\text{Fe}_2\text{O}_3$ , and 2 nm  $\text{TiO}_2$ . The sample was kept in the reaction solution for 17 h in darkness and does not show peaks indicating crystalline  $\text{TiO}_2$  phases.
